# Supplementary material for: Sickle cell disease promotes sex-dependent pathological bone loss through enhanced cathepsin proteolytic activity in mice
Source: PubMed Central journal article supplement — Blood Adv. 2022 Feb 25;6(5):1381–93. doi: 10.1182/bloodadvances.2021004615 (PMC8905708; doi:10.1182/bloodadvances.2021004615), 2022-02-25
Supplement: advancesADV2021004615-suppl1.pdf [file advancesADV2021004615-suppl1.pdf]

**Supplemental Figure 1. Analysis of the metaphyseal region in mice with sickle cell disease** (A) Representative microCT image of an entire femoral bone with the metaphysis outlined in red. (B) Trabecular bone volume fraction in the metaphyseal region generated by microCT in C57BL/6 and CatK-/- mice that were reconstituted with AA or SS bone marrow. (AA bone marrow= black, SS bone marrow =red, n=3-7 mice per group) (C) Representative 3D heat maps of the trabecular thickness in the metaphyseal region in SS 3-month-old mice administered saline or E-64 for two months from 1 month of age. A pseudocolor scale of blue (0 mm) to red (0.2mm) depicts trabecular thickness (Scale bar 100  $\mu$ m) (D-E) Trabecular bone parameters of trabecular thickness and bone mineral density generated by microCT scans after E-64 treatment (SS=black, SS with E-64= red, n=6-9 mice per group). Data expressed as mean  $\pm$  SD. Statistical significance, \*  $p < 0.05$ , determined by multiple t-tests with Holm-Sidak's post-hoc test. (Abbreviations: Tb. Th., Trabecular thickness; BMD, Bone Mineral Density)

**Supplemental Figure 2. Bone mechanical testing parameters generated by four-point bending technique in 3-month-old AA and SS mice with or without treatment with E64.** Based on displacement and force measurement graph and geometry data from microCT, ultimate stress (A) and stiffness (C) were calculated, and maximum force (B) was compared (n=5-8 per group).

**Supplemental Table 1. Summary of sex-specific means and significance generated for bone parameters in the distal epiphyseal region of AA, AS and SS mice at 3- and 5- months.** Data expressed as means  $\pm$  SD. Statistical significance, \*  $p < 0.05$ , determined by two-way ANOVA with Tukey's post-hoc test, n=4-6 mice per group. Abbreviations: Tb. Th., trabecular thickness; Tb. Sp., trabecular spacing; Conn. Density, connective density; BMD, bone mineral density; Tb. N., trabecular number.

**Supplemental Table 2. Summary of sex-specific means and significance generated for bone parameters in the metaphyseal region of AA, AS and SS mice at 3- and 5- months.** Data expressed as means  $\pm$  SD. Statistical significance, \*  $p < 0.05$ , determined by two-way ANOVA with Tukey's post-hoc

test, n=4-6 mice per group. Abbreviations: Tb. Th., trabecular thickness; Tb. Sp., trabecular spacing; Conn. Density, connective density; BMD, bone mineral density; Tb. N., trabecular number.

**Supplemental Table 3. Summary of sex-specific means and significance generated for bone parameters in the mid-Diaphyseal region of AA, AS and SS mice at 3- and 5- months.** Data expressed as means  $\pm$ SD. Statistical significance, \*  $p < 0.05$ , determined by two-way ANOVA with Tukey's post-hoc test, n=4-6 mice per group. Abbreviations: Cort. Th., cortical thickness; BMD, bone mineral density; BA, bone area

Supplemental Figure 1

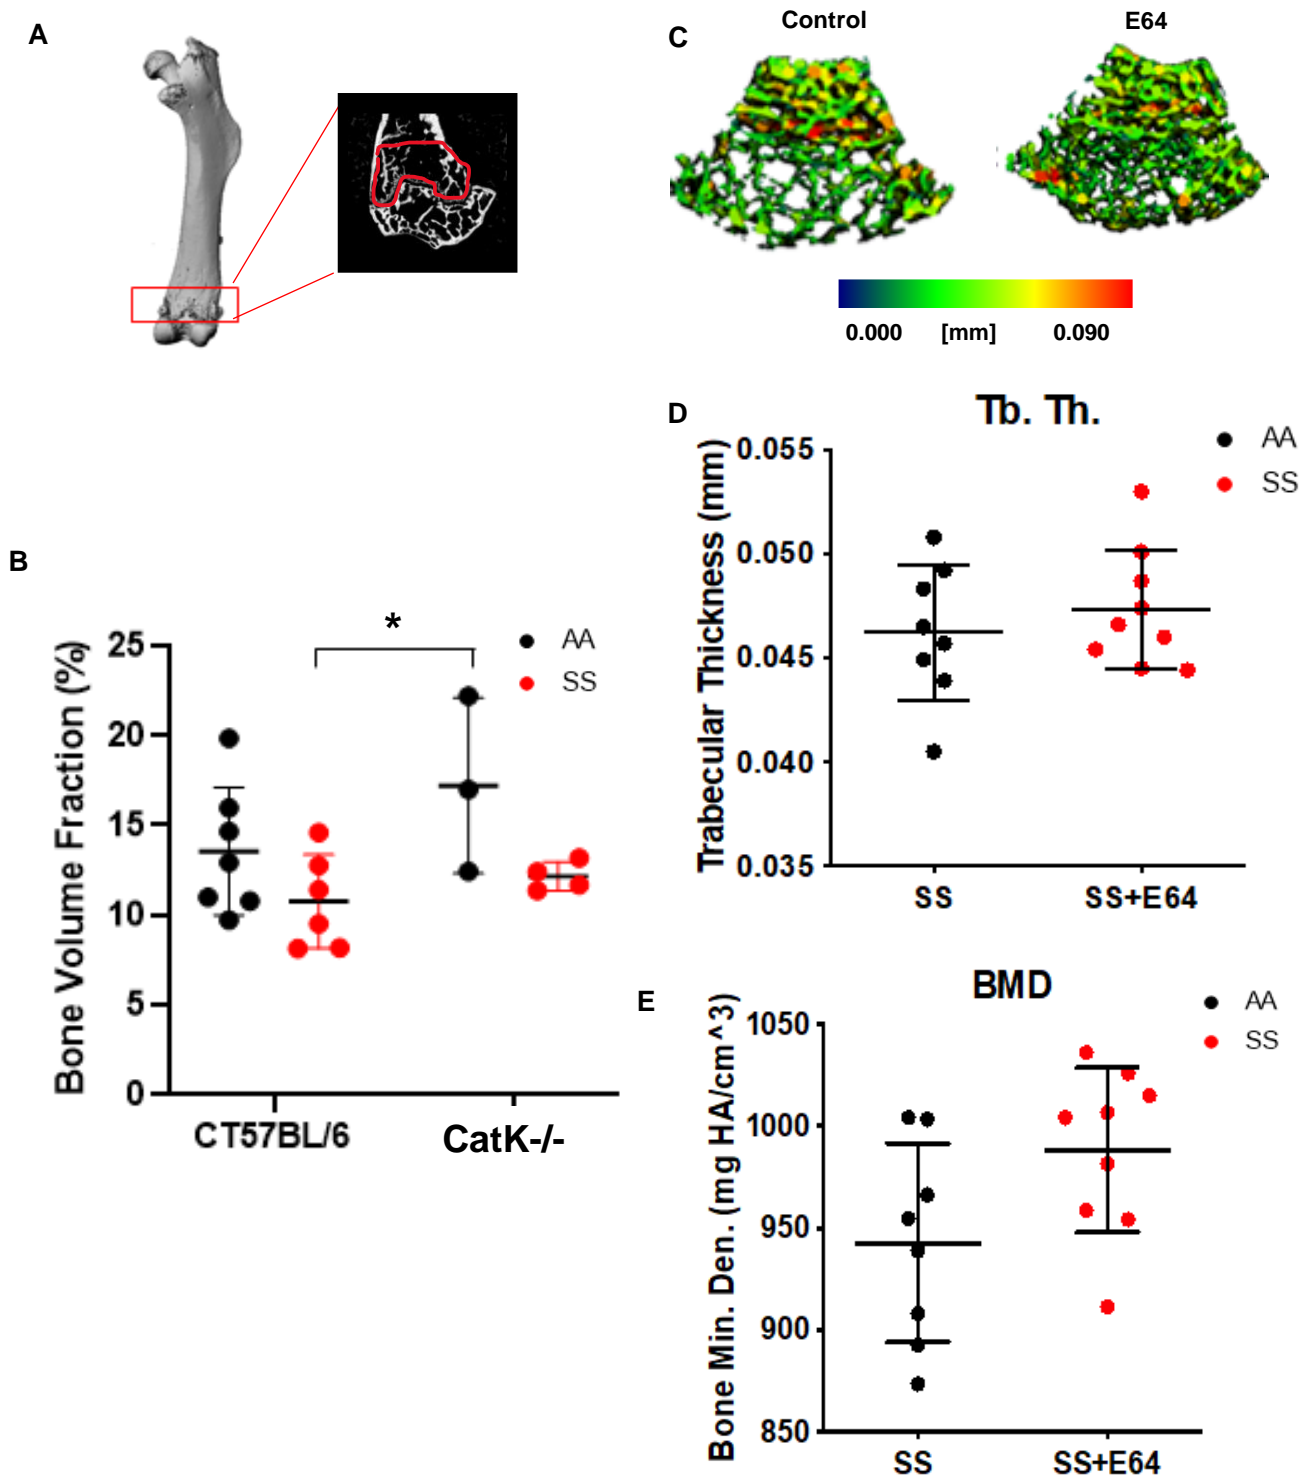

Supplemental Figure 1. Analysis of the metaphyseal region in mice with sickle cell disease

## Supplemental Figure 2

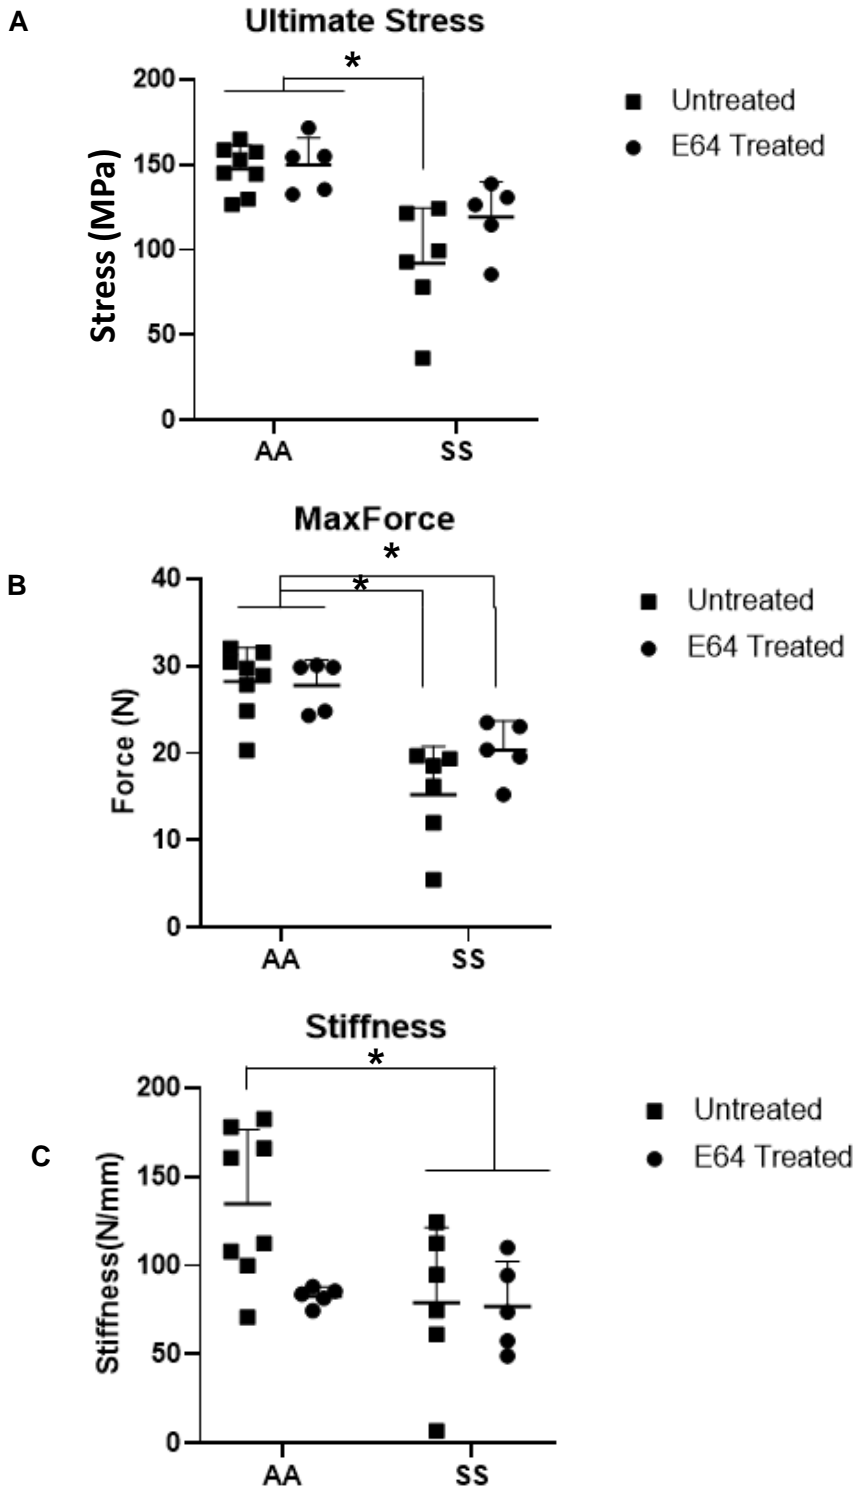

Supplemental Figure 2. Bone mechanical testing parameters generated by four-point bending technique in 3-month-old AA and SS mice with or without treatment with E64.

## Distal Epiphysis

|                                         |             | AA                            |                                  | AS                            |                                  | SS                              |                                |
|-----------------------------------------|-------------|-------------------------------|----------------------------------|-------------------------------|----------------------------------|---------------------------------|--------------------------------|
|                                         |             | Male                          | Female                           | Male                          | Female                           | Male                            | Female                         |
| <b>Tb. Th. (mm)</b>                     | <b>3 mo</b> | 0.054<br>±0.0020 <sup>a</sup> | 0.056<br>±0.0029 <sup>c</sup>    | 0.053<br>±0.0019              | 0.052<br>±0.0010                 | 0.048<br>±0.0013                | 0.048<br>±0.0016               |
|                                         | <b>5 mo</b> | 0.061<br>±0.0052 <sup>a</sup> | 0.065<br>±0.0070 <sup>d</sup>    | 0.064<br>±0.0054 <sup>a</sup> | 0.061<br>±0.0014                 | 0.061<br>±0.0078 <sup>a,b</sup> | 0.056<br>±0.0047               |
| <b>BMD (mg HA/cm<sup>3</sup>)</b>       | <b>3 mo</b> | 1108<br>±27.40                | 1116<br>±22.29                   | 1124<br>±30.82                | 1123<br>±31.10 <sup>c</sup>      | 1063<br>±56.08                  | 1137<br>±27.68                 |
|                                         | <b>5 mo</b> | 1158<br>±37.11 <sup>a</sup>   | 1143<br>±17.76 <sup>c,d</sup>    | 1176<br>±15.88 <sup>a</sup>   | 1175<br>±15.10 <sup>d</sup>      | 1143<br>±28.48                  | 1094<br>±28.99                 |
| <b>Tb. Sp. (mm)</b>                     | <b>3 mo</b> | 0.129<br>±0.00678             | 0.139<br>±0.00335 <sup>c</sup>   | 0.118<br>±0.00264             | 0.139<br>±0.00487 <sup>c</sup>   | 0.120<br>±0.00550               | 0.127<br>±0.00494              |
|                                         | <b>5 mo</b> | 0.128<br>±0.0100              | 0.145<br>±0.00282 <sup>c,d</sup> | 0.127<br>±0.00962             | 0.144<br>±0.00346 <sup>c,d</sup> | 0.128<br>±0.0069                | 0.129<br>±0.00494              |
| <b>Conn. Density (1/mm<sup>3</sup>)</b> | <b>3 mo</b> | 239.9<br>±13.26 <sup>a</sup>  | 174.6<br>±11.59 <sup>c</sup>     | 277.2<br>±28.22 <sup>a</sup>  | 210.8<br>±36.86 <sup>c</sup>     | 382.2<br>±23.31                 | 291.1<br>±25.31                |
|                                         | <b>5 mo</b> | 202.5<br>±26.22 <sup>a</sup>  | 127.1<br>±10.19 <sup>c,d</sup>   | 179.6<br>±20.80 <sup>a</sup>  | 146.2<br>±27.54 <sup>c,d</sup>   | 229.6<br>±72.77 <sup>a,b</sup>  | 228.1<br>±57.50 <sup>c,d</sup> |
| <b>Tb. N. (1/mm)</b>                    | <b>3 mo</b> | 8.224<br>±0.2361              | 8.148<br>±0.1879                 | 8.187<br>±0.1411              | 8.119<br>±0.1075                 | 8.518<br>±0.5017                | 8.242<br>±0.1408               |
|                                         | <b>5 mo</b> | 7.800<br>±0.4036              | 8.164<br>±0.3537                 | 8.072<br>±0.4569              | 7.871<br>±0.2936                 | 8.049<br>±0.1775                | 8.280<br>±0.2359               |
| <b>BV/TV (%)</b>                        | <b>3 mo</b> | 31.64<br>±2.160               | 27.50<br>±1.595                  | 33.98<br>±1.401 <sup>a</sup>  | 26.64<br>±2.531                  | 29.20<br>±2.268                 | 27.36<br>±1.704                |
|                                         | <b>5 mo</b> | 34.56<br>±1.886               | 30.37<br>±3.552                  | 37.60<br>±3.116 <sup>a</sup>  | 29.11<br>±2.800                  | 32.53<br>±3.158                 | 29.76<br>±2.094                |

<sup>a</sup>p <0.05 compared with 3 mo SS male, <sup>b</sup>p <0.05 compared with 5 mo SS male, <sup>c</sup>p <0.05 compared with 3 mo SS female, <sup>d</sup>p <0.05 compared with 5 mo SS female by determined by two-way ANOVA with Tukey's post-hoc

**Supplemental Table 1. Summary of sex-specific means and significance generated for bone parameters in the distal epiphyseal region of AA, AS and SS mice at 3- and 5- months.**

## Metaphysis

|                                         |             | AA                            |                               | AS                            |                                | SS                              |                                |
|-----------------------------------------|-------------|-------------------------------|-------------------------------|-------------------------------|--------------------------------|---------------------------------|--------------------------------|
|                                         |             | Male                          | Female                        | Male                          | Female                         | Male                            | Female                         |
| <b>Tb. Th. (mm)</b>                     | <b>3 mo</b> | 0.048<br>±0.0018              | 0.049<br>±0.0063              | 0.047<br>±0.0013              | 0.045<br>±0.0011               | 0.046<br>±0.0018                | 0.045<br>±0.0030               |
|                                         | <b>5 mo</b> | 0.054<br>±0.0051              | 0.046<br>±0.0030              | 0.056<br>±0.0085              | 0.044<br>±0.0013               | 0.056<br>±0.0030                | 0.045<br>±0.0026               |
| <b>BMD (mg HA/cm<sup>3</sup>)</b>       | <b>3 mo</b> | 951<br>±76.52                 | 976<br>±79.78                 | 1013<br>±25.98                | 1008<br>±20.11                 | 975<br>±55.52                   | 974<br>±46.19                  |
|                                         | <b>5 mo</b> | 1053<br>±24.33                | 1012<br>±60.39                | 1082<br>±32.81                | 1052<br>±40.65                 | 1055<br>±61.03                  | 1015<br>±58.56                 |
| <b>Tb. Sp. (mm)</b>                     | <b>3 mo</b> | 0.165<br>±0.00035             | 0.175<br>±0.0100              | 0.162<br>±0.00728             | 0.176<br>±0.0187               | 0.142<br>±0.0153                | 0.166<br>±0.00141              |
|                                         | <b>5 mo</b> | 0.220<br>±0.0309 <sup>a</sup> | 0.223<br>±0.0199              | 0.220<br>±0.0267              | 0.275<br>±0.0206 <sup>c</sup>  | 0.222<br>±0.0349 <sup>a,b</sup> | 0.266<br>±0.0606               |
| <b>Conn. Density (1/mm<sup>3</sup>)</b> | <b>3 mo</b> | 309.1<br>±59.53 <sup>a</sup>  | 310.7<br>±120.37 <sup>c</sup> | 314.8<br>±11.95 <sup>a</sup>  | 362.2<br>±102.15               | 467.7<br>±36.47                 | 316.9<br>±49.52                |
|                                         | <b>5 mo</b> | 161.7<br>±43.92 <sup>a</sup>  | 244.3<br>±34.75 <sup>c</sup>  | 149.5<br>±53.20 <sup>a</sup>  | 118.5<br>±31.40 <sup>c,d</sup> | 203.7<br>±51.98 <sup>a,b</sup>  | 198.7<br>±83.13 <sup>c,d</sup> |
| <b>Tb. N. (1/mm)</b>                    | <b>3 mo</b> | 6.131<br>±0.3995              | 5.750±0.4368                  | 6.128<br>±0.2723              | 5.672<br>±0.5533               | 7.139<br>±0.7783                | 6.337<br>±0.03097              |
|                                         | <b>5 mo</b> | 4.587<br>±0.6318 <sup>a</sup> | 4.485<br>±0.3077 <sup>c</sup> | 4.435<br>±0.4294 <sup>a</sup> | 3.762<br>±0.2543 <sup>c</sup>  | 4.682<br>±0.6898 <sup>a,b</sup> | 4.289<br>±1.084 <sup>c,d</sup> |
| <b>BV/TV (%)</b>                        | <b>3 mo</b> | 19.14<br>±1.460               | 21.95<br>±5.798               | 17.23<br>±1.533               | 20.40<br>±6.362                | 22.47±1.961                     | 20.12<br>±5.211                |
|                                         | <b>5 mo</b> | 17.80<br>±4.073               | 14.77<br>±3.127               | 16.98<br>±4.247               | 9.31<br>±0.4216 <sup>c</sup>   | 17.72<br>±2.814                 | 13.78<br>±2.114                |

<sup>a</sup>p <0.05 compared with 3 mo SS male, <sup>b</sup>p <0.05 compared with 5 mo SS male, <sup>c</sup>p <0.05 compared with 3 mo SS female, <sup>d</sup>p <0.05 compared with 5 mo SS female by determined by two-way ANOVA with Tukey's post-hoc

**Supplemental Table 2. Summary of sex-specific means and significance generated for bone parameters in the metaphyseal region of AA, AS and SS mice at 3- and 5- months.**

## Mid-Diaphysis

|                              |      | AA                               |                                 | AS                              |                                | SS                               |                   |
|------------------------------|------|----------------------------------|---------------------------------|---------------------------------|--------------------------------|----------------------------------|-------------------|
|                              |      | Male                             | Female                          | Male                            | Female                         | Male                             | Female            |
| Cort. Th. (mm)               | 3 mo | 0.163<br>±0.00806 <sup>a</sup>   | 0.159<br>±0.0106 <sup>c</sup>   | 0.155<br>±0.0122 <sup>a</sup>   | 0.152<br>±0.0158 <sup>c</sup>  | 0.117<br>±0.00992                | 0.122<br>±0.00751 |
|                              | 5 mo | 0.184<br>±0.00517 <sup>a,b</sup> | 0.186<br>±0.0136 <sup>d</sup>   | 0.184<br>±0.0103 <sup>a,b</sup> | 0.167<br>±0.00514 <sup>d</sup> | 0.151<br>±0.0050 <sup>2a,b</sup> | 0.137<br>±0.00654 |
| BMD (mg HA/cm <sup>3</sup> ) | 3 mo | 1414<br>±4.523 <sup>a</sup>      | 1399<br>±41.28                  | 1420<br>±27.41 <sup>a,b</sup>   | 1418<br>±13.67 <sup>c</sup>    | 1345<br>±23.59                   | 1368<br>±12.35    |
|                              | 5 mo | 1458<br>±4.251 <sup>a,b</sup>    | 1461<br>±42.89 <sup>c,d</sup>   | 1442<br>±34.68 <sup>a</sup>     | 1467<br>±4.978 <sup>c,d</sup>  | 1389<br>±55.09                   | 1398<br>±24.86    |
| BA (mm <sup>2</sup> )        | 3 mo | 0.534<br>±0.0183 <sup>a</sup>    | 0.492<br>±0.0307                | 0.515<br>±0.0493 <sup>a</sup>   | 0.484<br>±0.0246               | 0.399<br>±0.0405                 | 0.415<br>±0.0232  |
|                              | 5 mo | 0.666<br>±0.0523 <sup>a,b</sup>  | 0.587<br>±0.0513 <sup>c,d</sup> | 0.657<br>±0.0343 <sup>b</sup>   | 0.534<br>±0.0157 <sup>c</sup>  | 0.555<br>±0.0611                 | 0.460<br>±0.0663  |
| TA (mm <sup>2</sup> )        | 3 mo | 1.296±0.3<br>953                 | 1.212<br>±0.05478               | 1.362<br>±0.03019               | 1.263<br>±0.1011               | 1.298<br>±0.0630<br>0            | 1.318<br>±0.06452 |
|                              | 5 mo | 1.493±0.2<br>884                 | 1.282<br>±0.06568               | 1.590±0.2<br>064                | 1.281<br>±0.1015               | 1.604±0<br>.2242                 | 1.359<br>±0.1908  |
| BA/TA (%)                    | 3 mo | 39.90<br>±1.628 <sup>a,b</sup>   | 41.39<br>±3.897 <sup>c</sup>    | 38.29<br>±2.195 <sup>a</sup>    | 38.31<br>±2.751 <sup>c</sup>   | 29.40<br>±2.331                  | 31.42<br>±0.9521  |
|                              | 5 mo | 42.24<br>±1.753 <sup>a,b</sup>   | 45.83<br>±2.595 <sup>d</sup>    | 41.76<br>±3.238 <sup>a,b</sup>  | 41.8<br>±0.8662 <sup>d</sup>   | 34.13<br>±1.267 <sup>a,b</sup>   | 34.1<br>±3.118    |

<sup>a</sup>p <0.05 compared with 3 mo SS male, <sup>b</sup>p <0.05 compared with 5 mo SS male, <sup>c</sup>p <0.05 compared with 3 mo SS female, <sup>d</sup>p <0.05 compared with 5 mo SS female by determined by two-way ANOVA with Tukey's post-hoc

**Supplemental Table 3. Summary of sex-specific means and significance generated for bone parameters in the mid-diaphyseal region of AA, AS and SS mice at 3- and 5- months.**
